# Supplementary material
Source: Research Square preprint supplement (doi:10.21203/rs.3.rs-8481900/v1)

**Fig.5G Original data -WB**

Figure 5 G

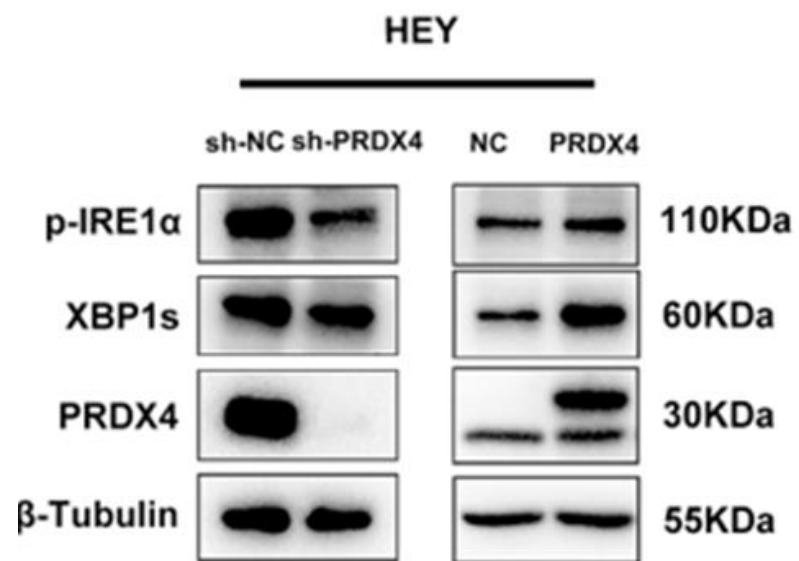

Uncropped original western blots

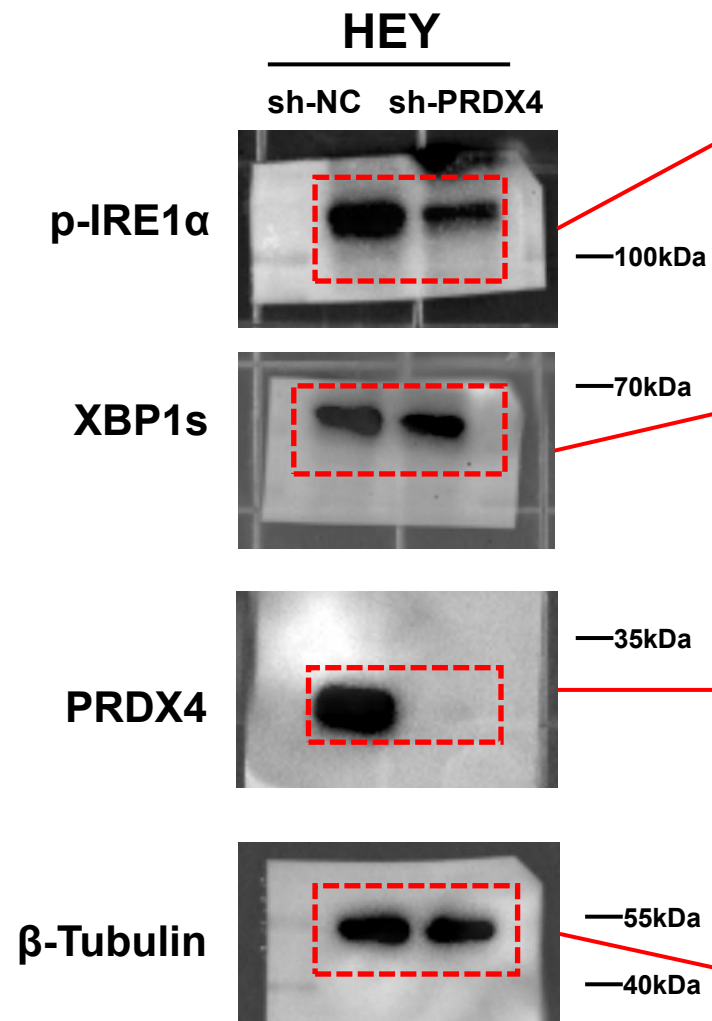

Original chemiluminescence image

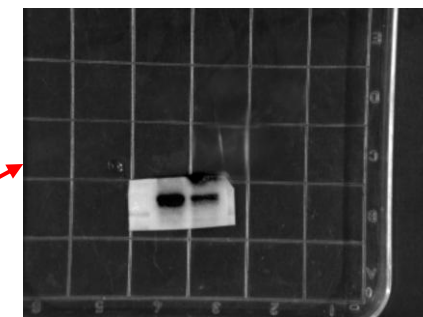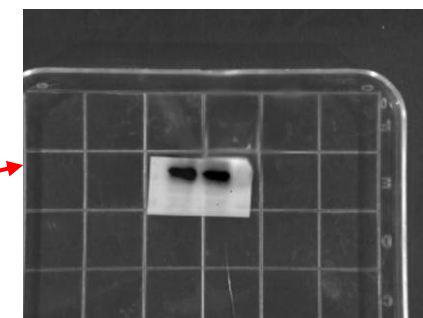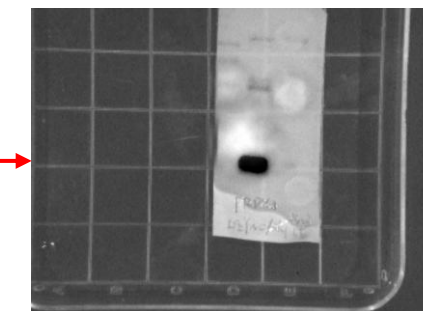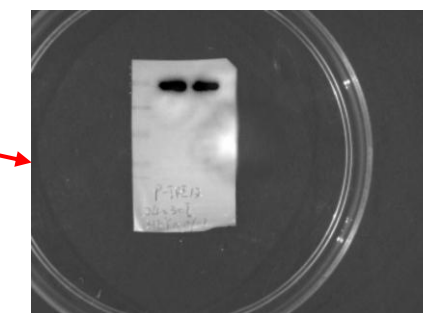

Figure 5 G

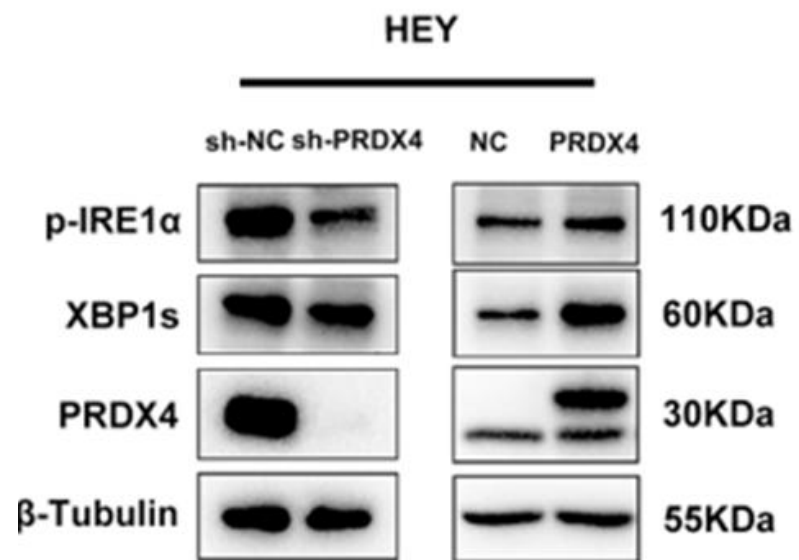

Uncropped original western blots

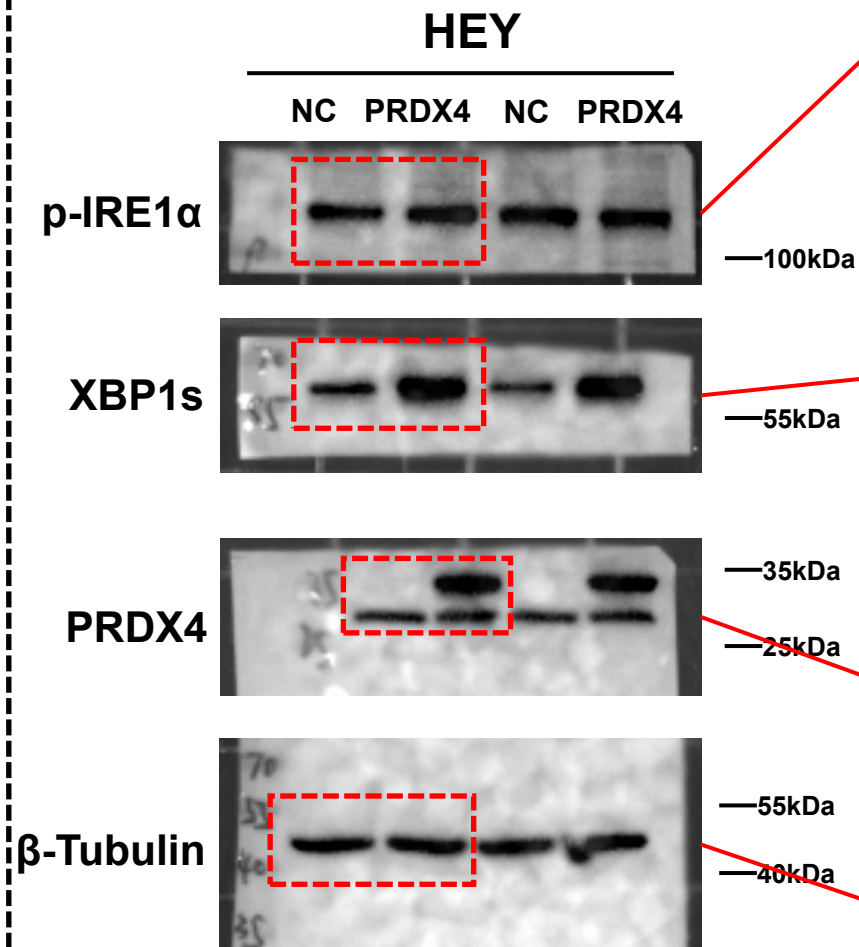

Original chemiluminescence image

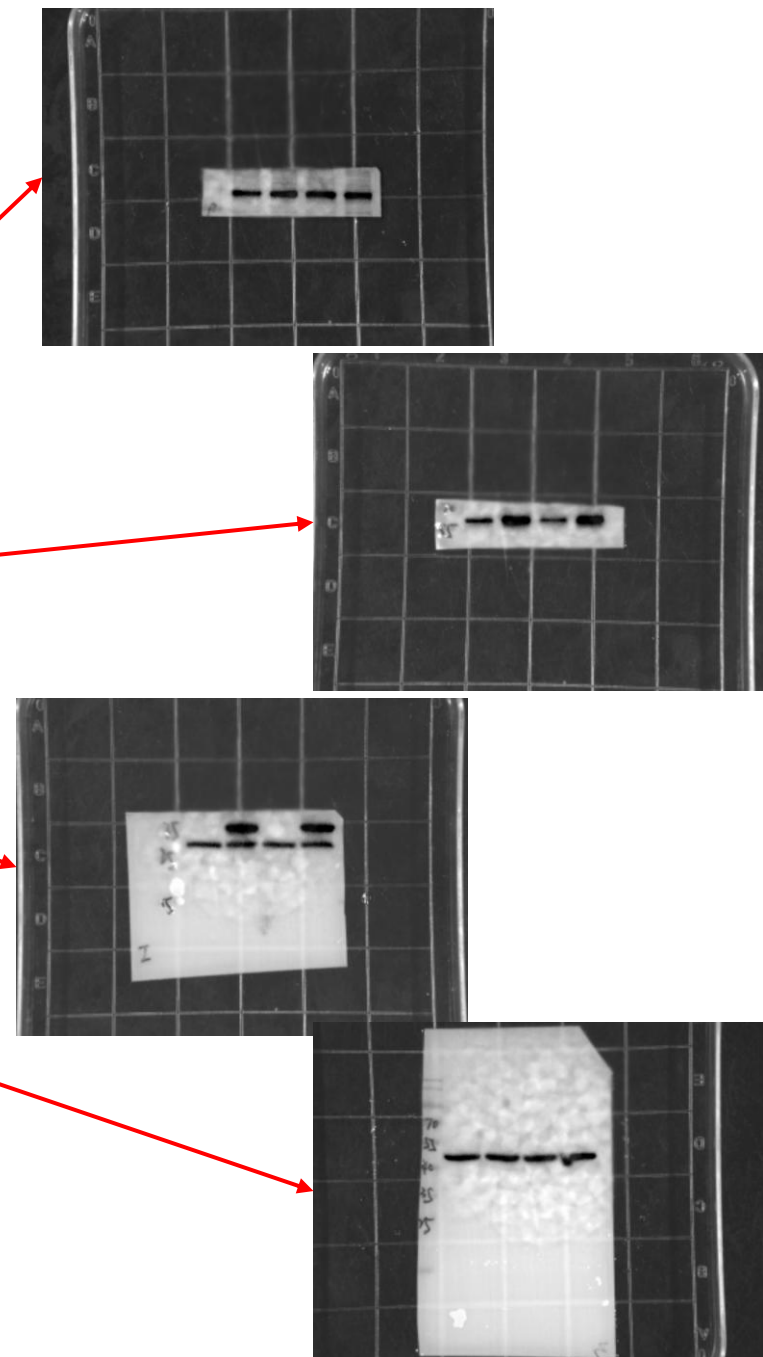

**Fig.5H Original data -WB**

Figure 5 H

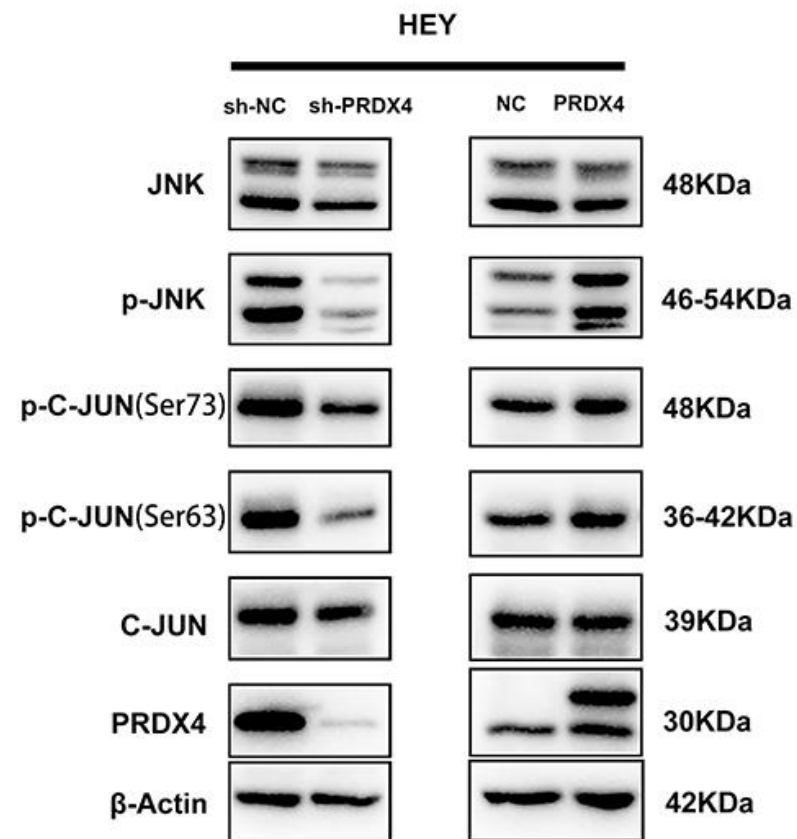

Uncropped original western blots

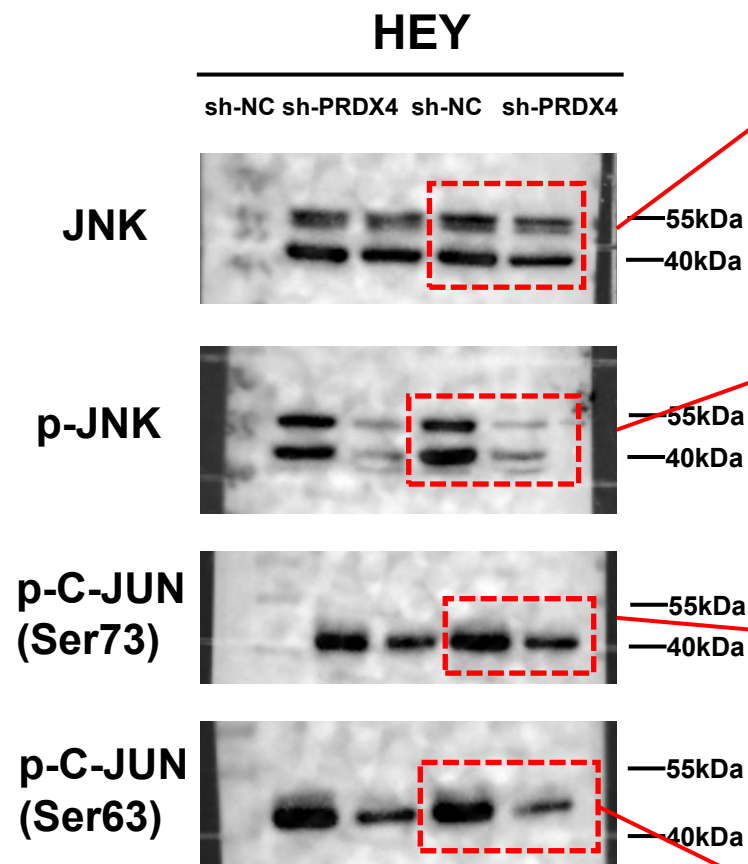

Original chemiluminescence image

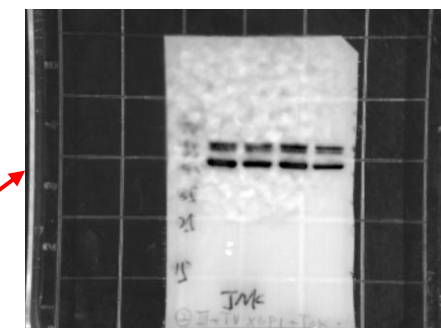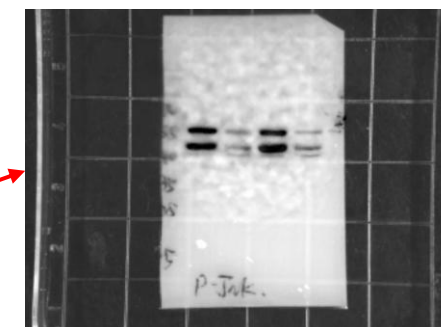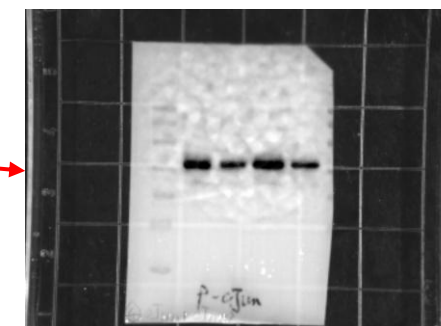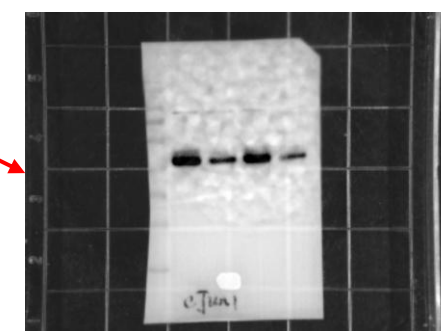

Figure 5 H

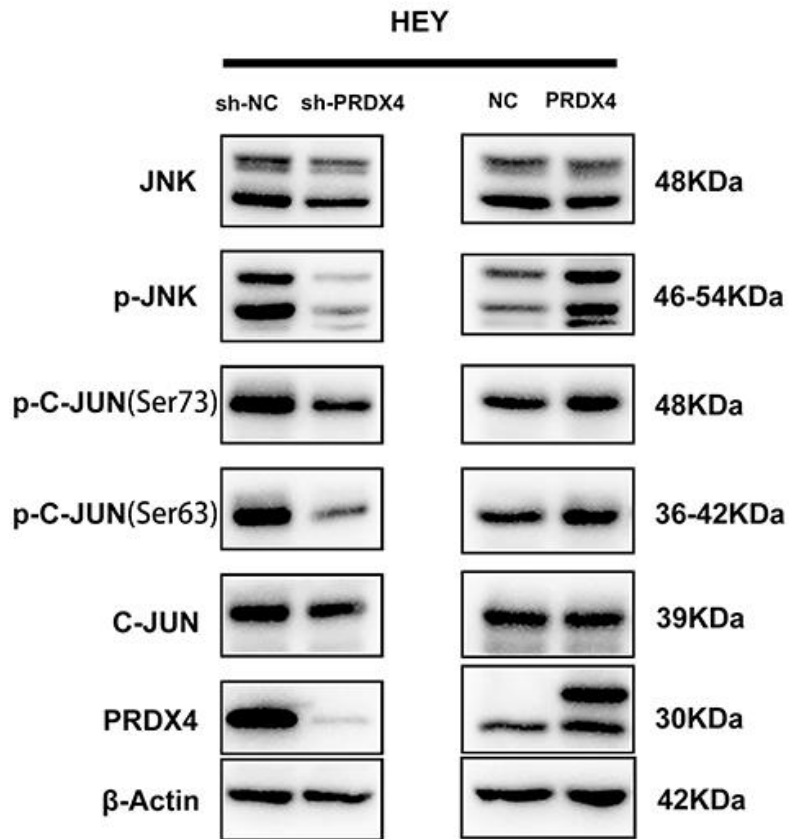

Uncropped original western blots

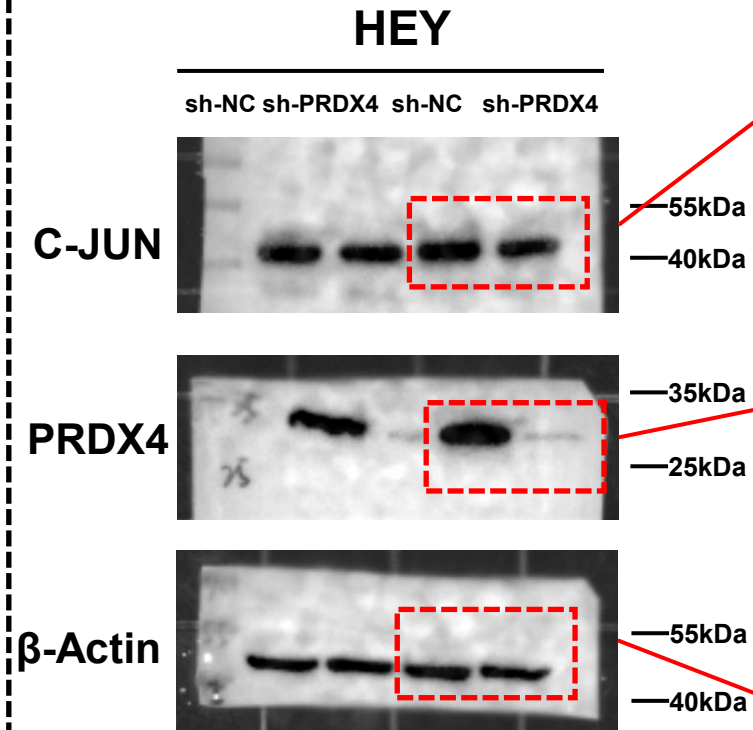

Original chemiluminescence image

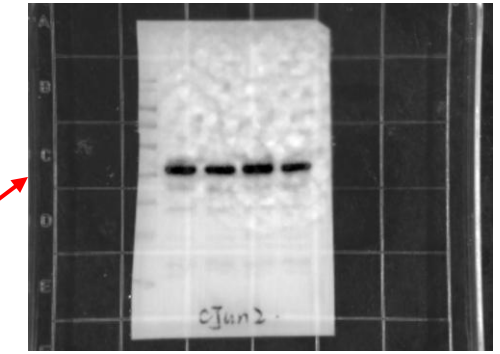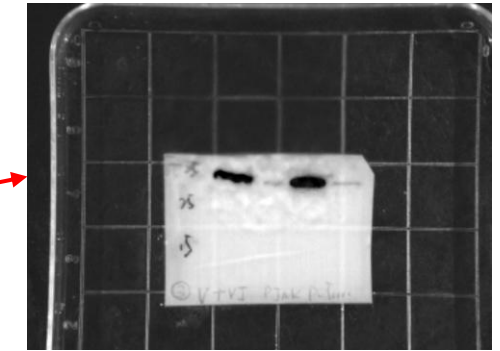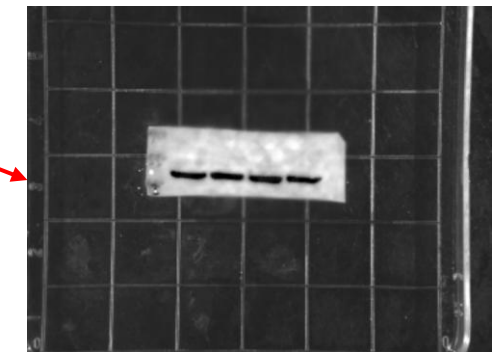

Figure 5 H

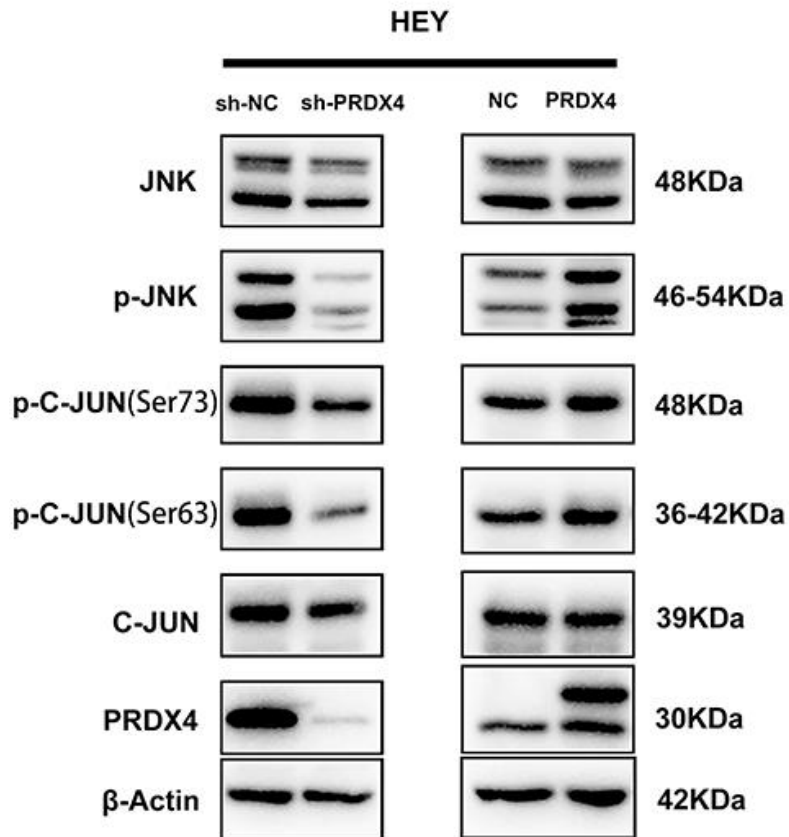

Uncropped original western blots

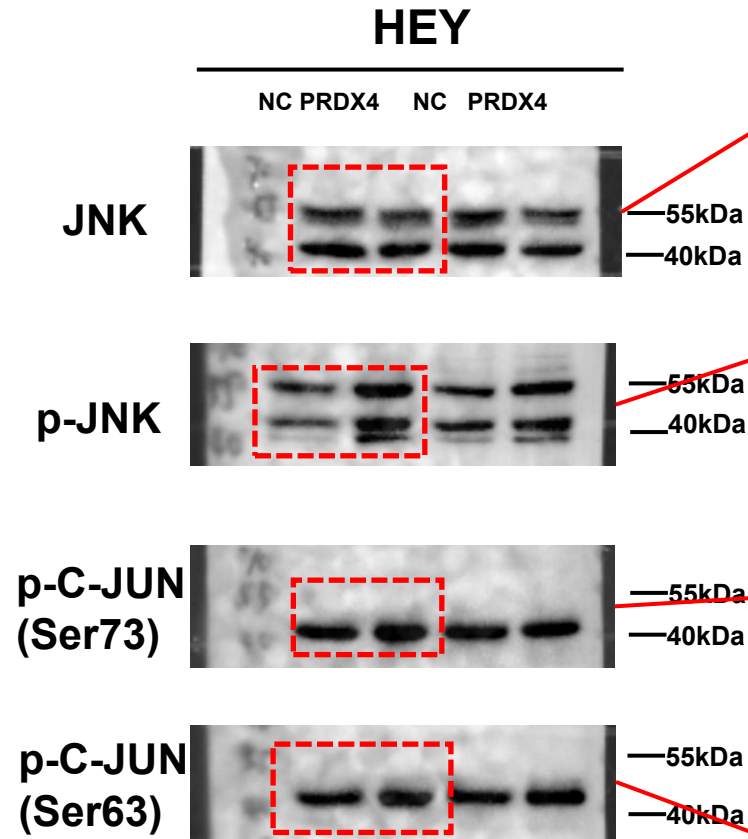

Original chemiluminescence image

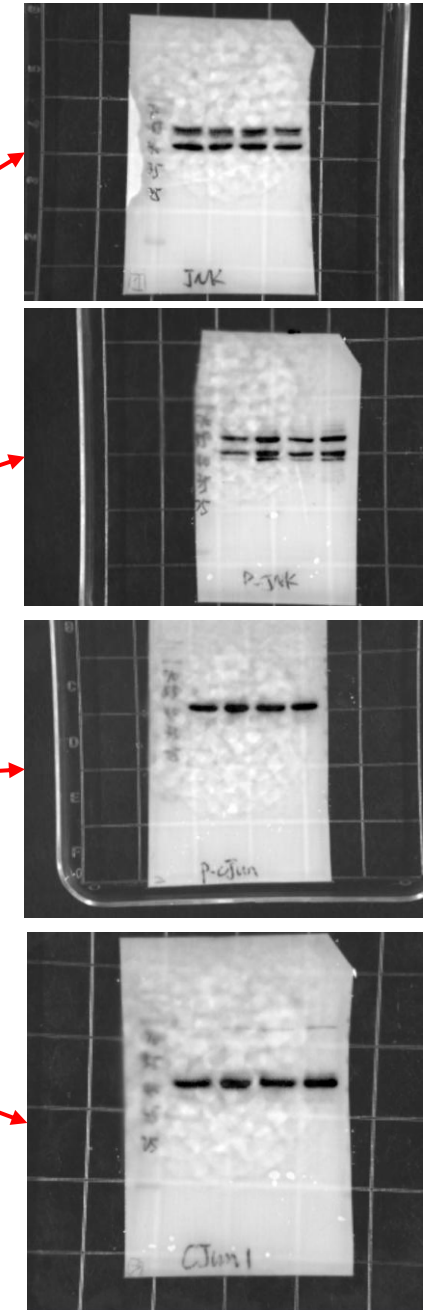

Figure 5 H

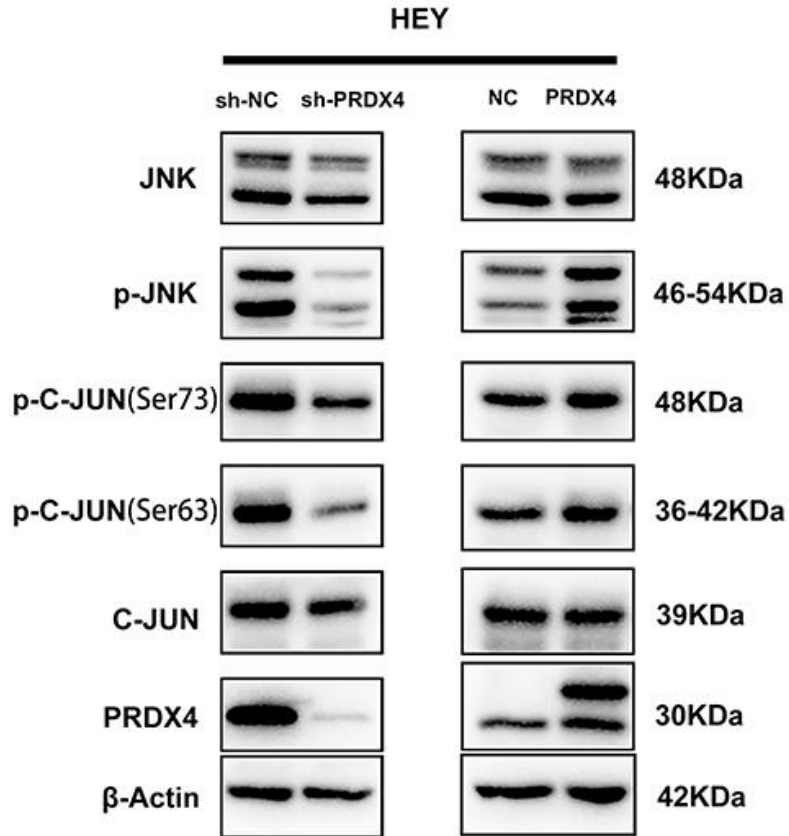

Uncropped original western blots

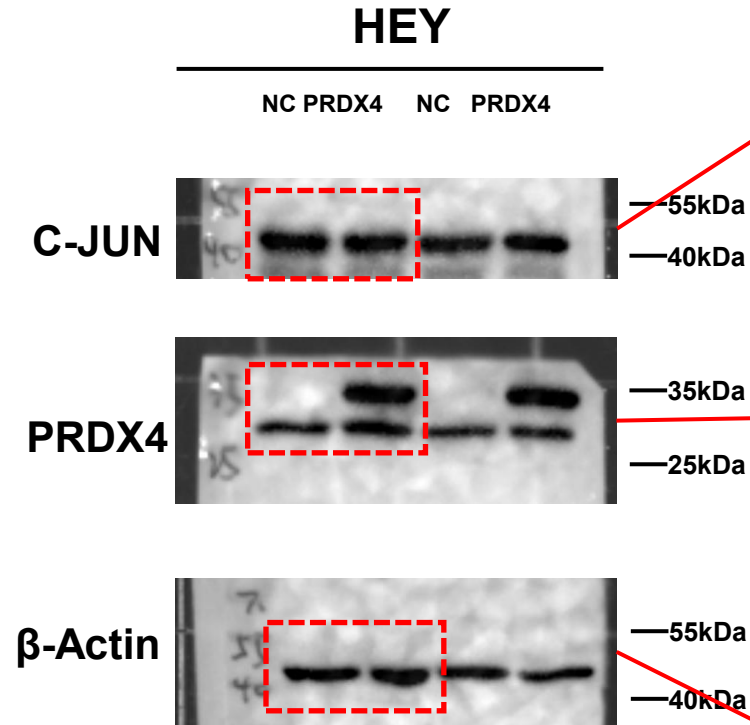

Original chemiluminescence image

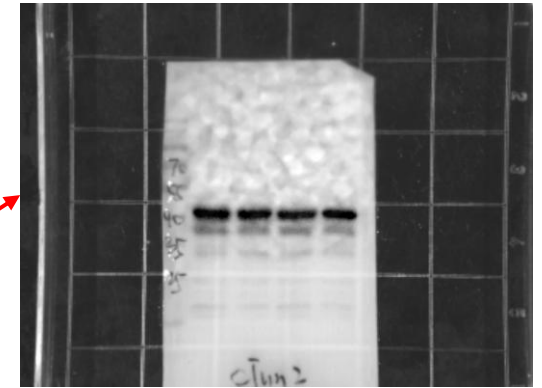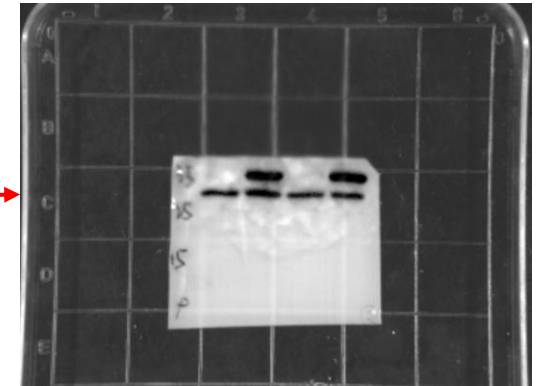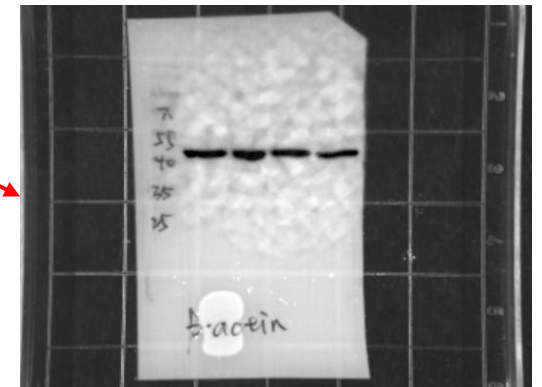

**Fig.6A Original data -WB**

Figure 6 A

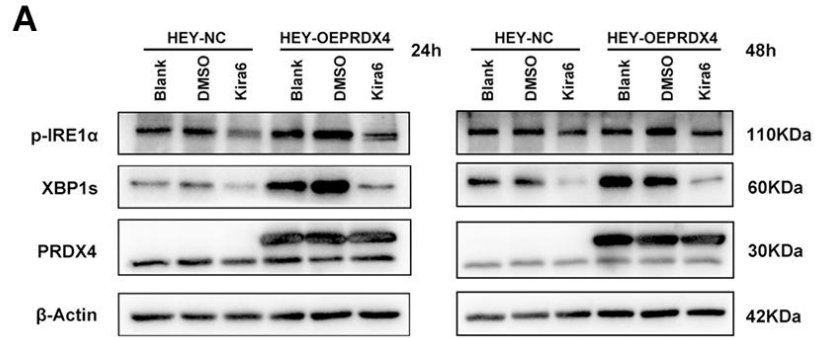

Uncropped original western blots

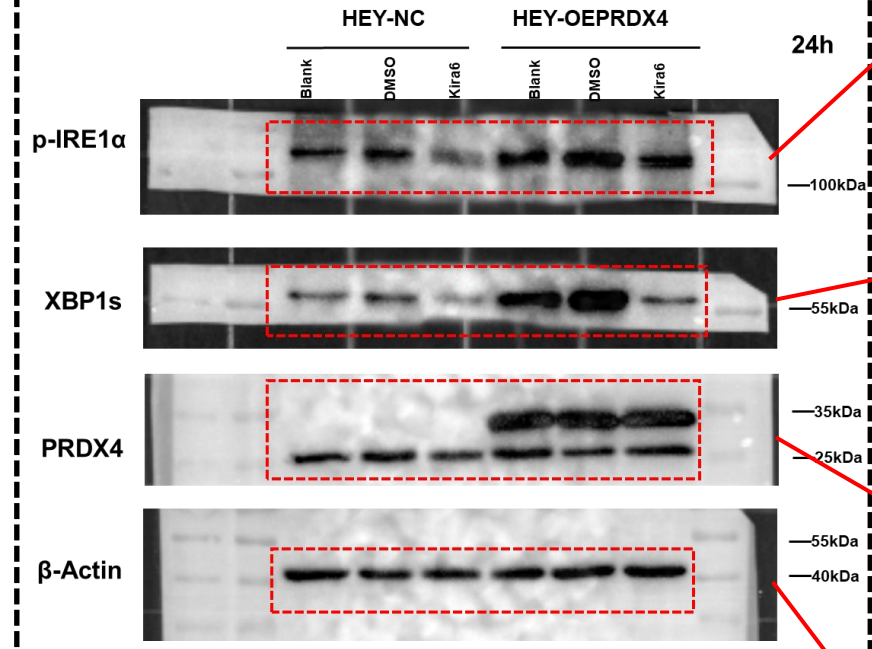

Original chemiluminescence image

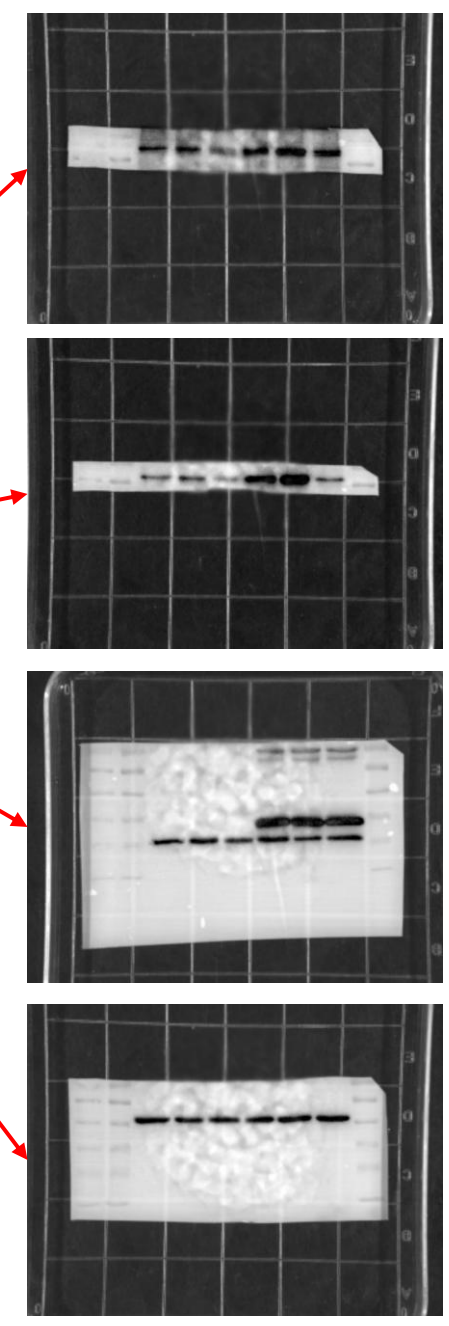

Figure 6 A

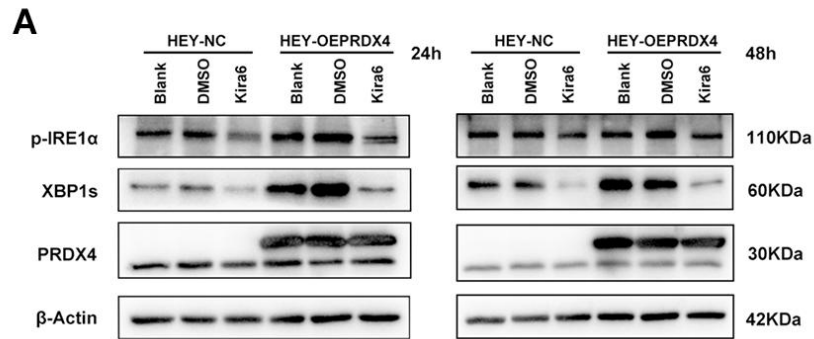

Uncropped original western blots

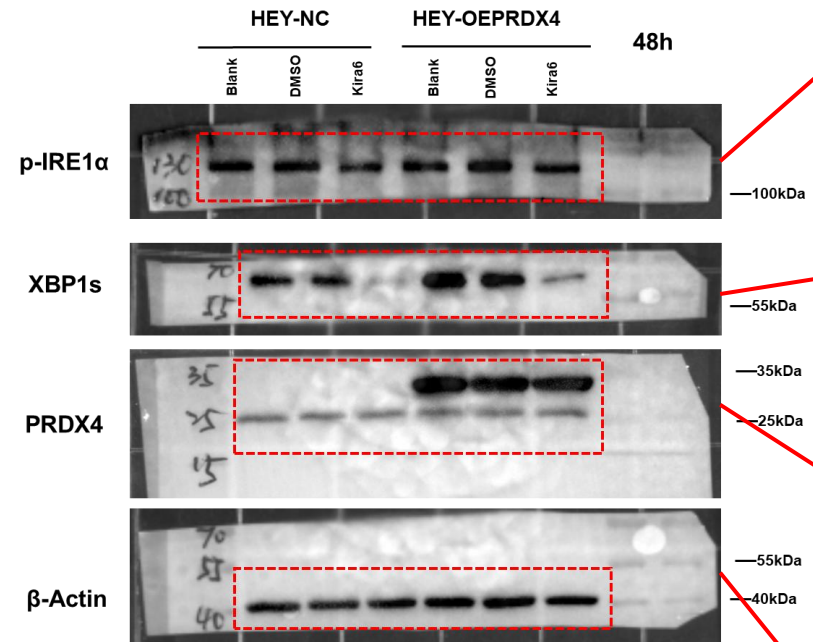

Original chemiluminescence image

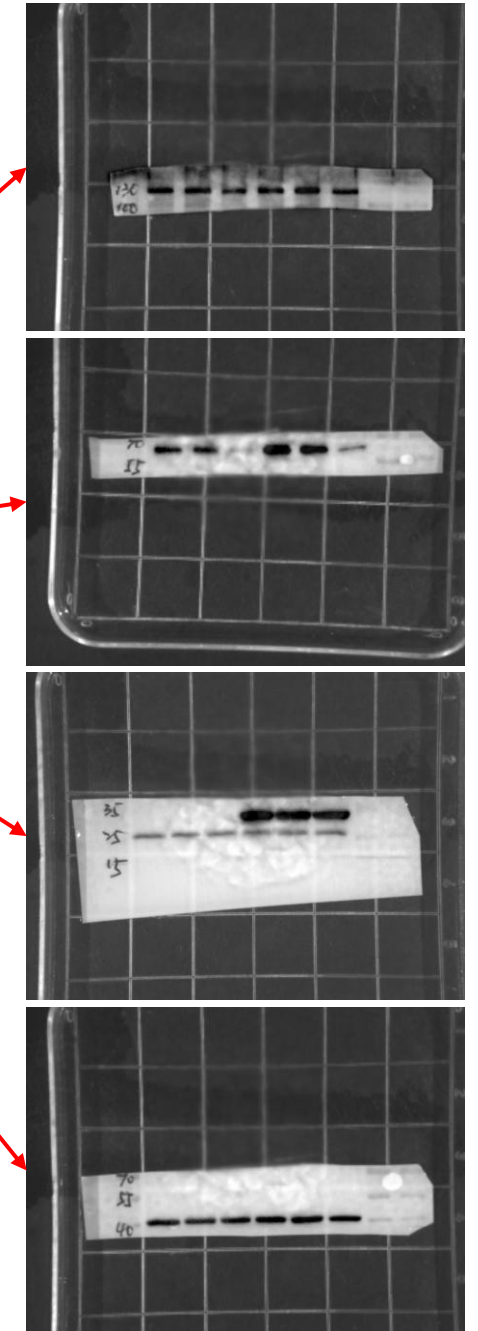

**Fig.6B Original data -WB**

Figure 6 B

**B**

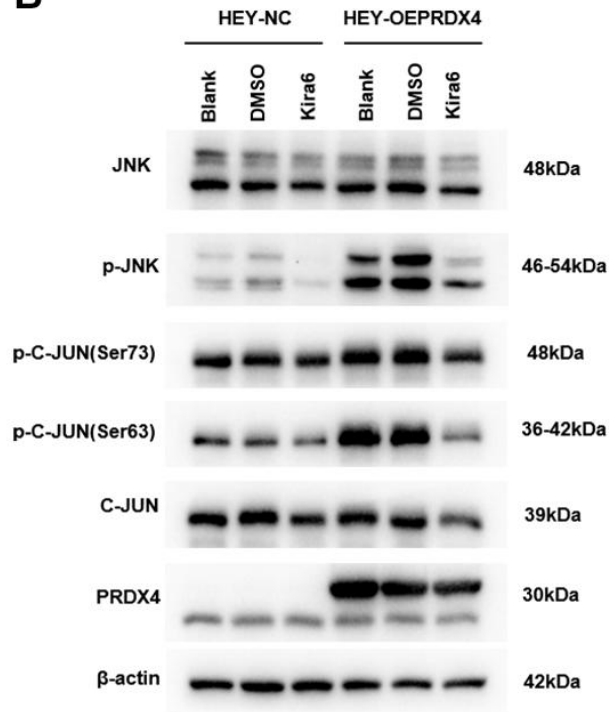

Uncropped original western blots

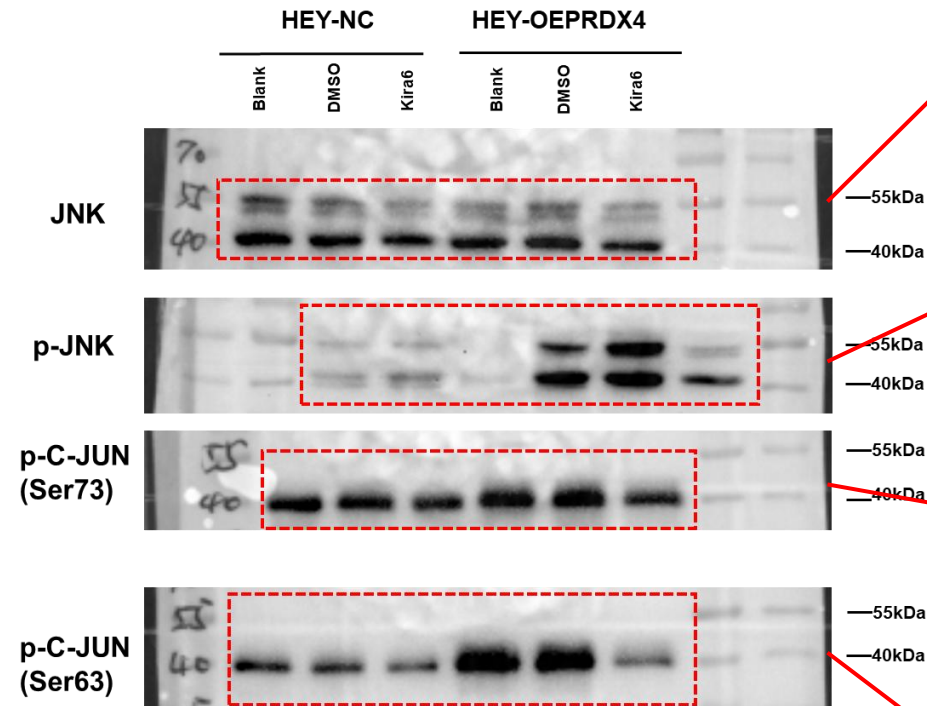

Original chemiluminescence image

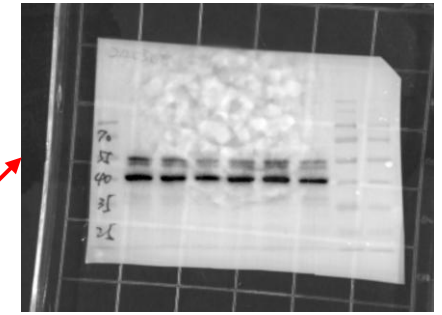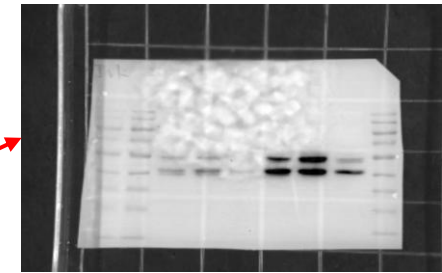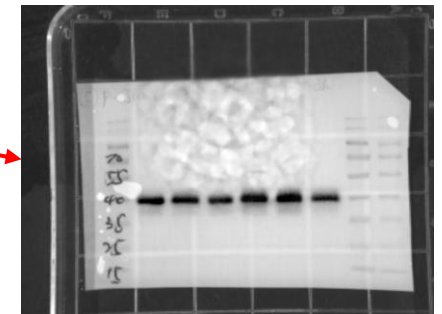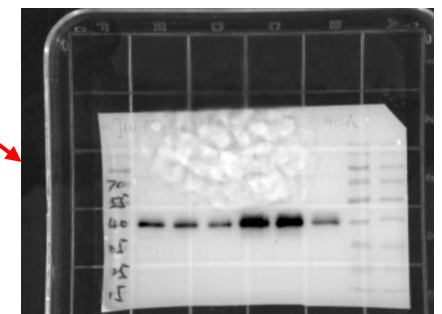

Figure 6 B

**B**

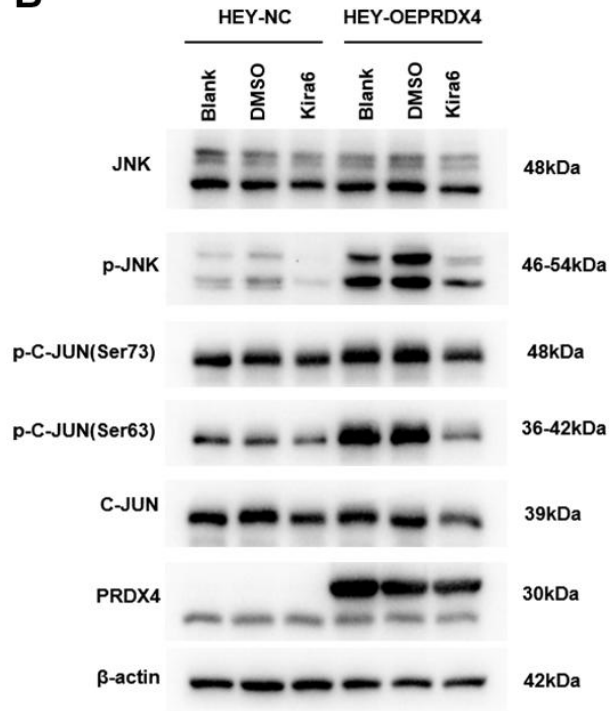

Uncropped original western blots

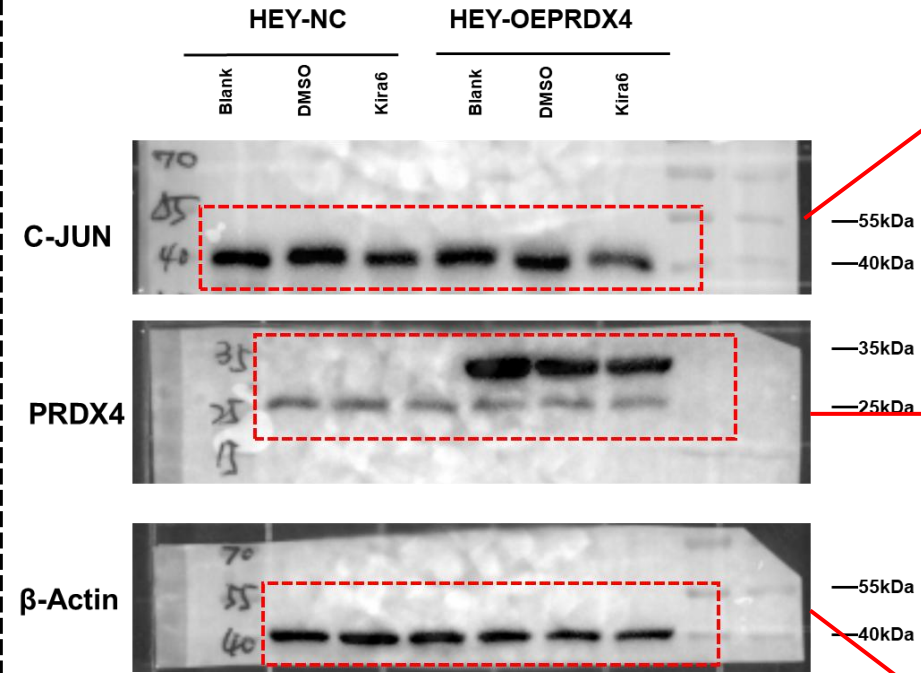

Original chemiluminescence image

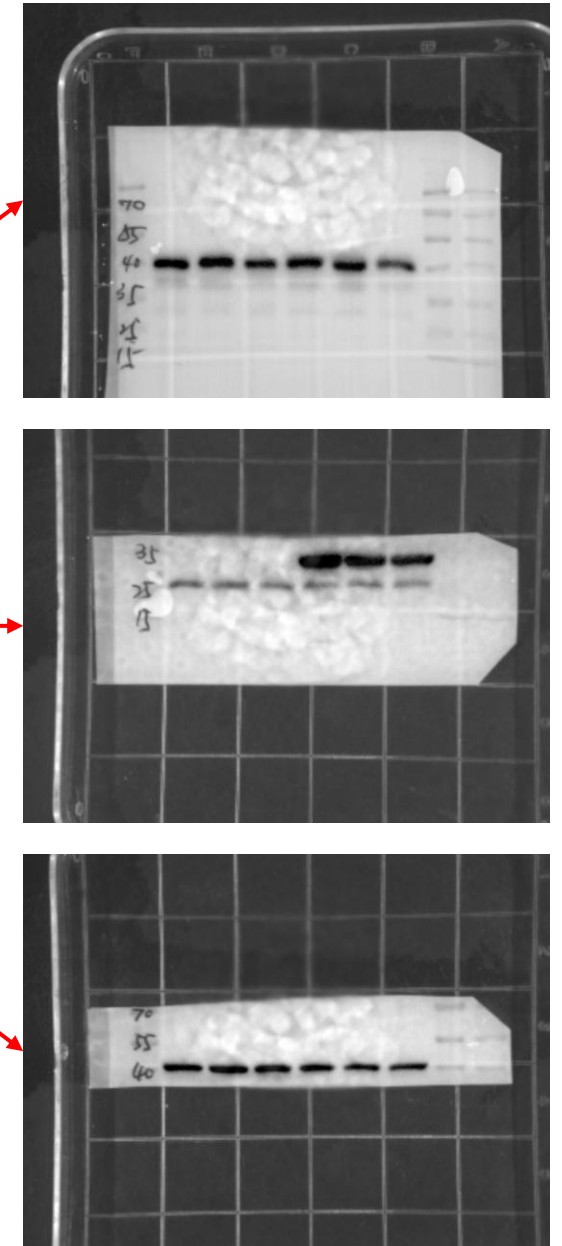

**Fig.S1 A Original data -WB**

Figure S1 A

A

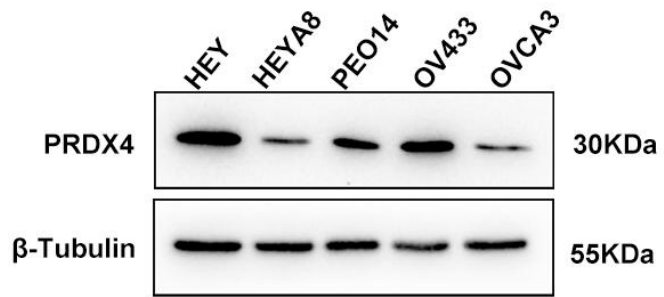

Uncropped original western blots

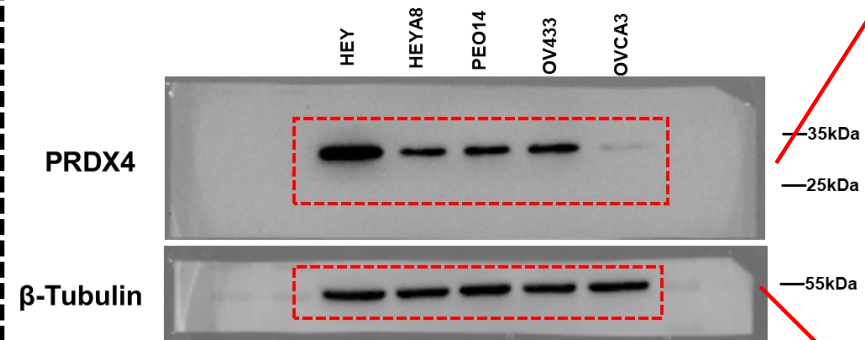

Original chemiluminescence image

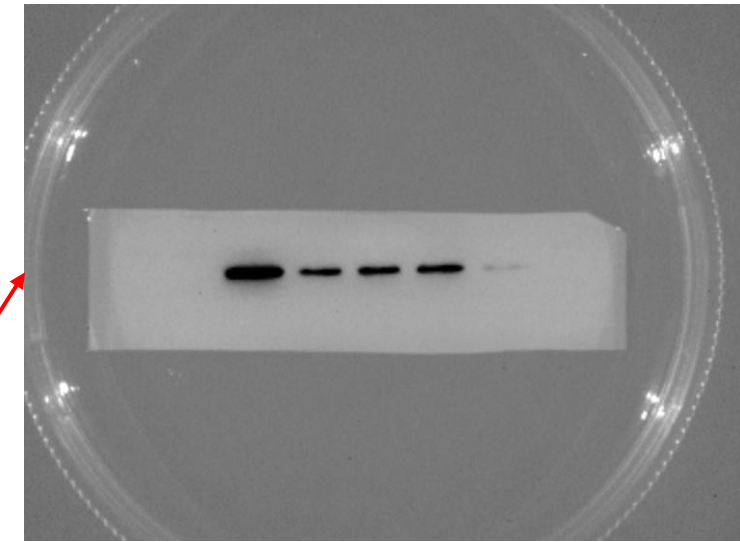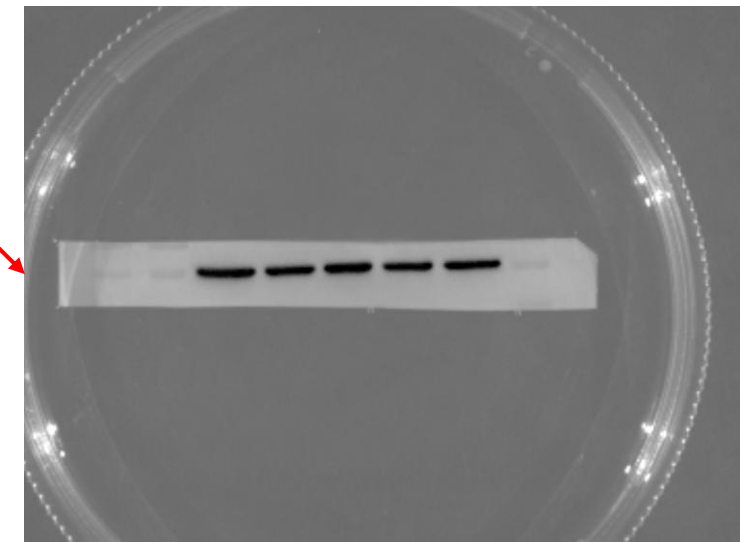

**Fig.S1 B Original data -WB**

Figure S1 B

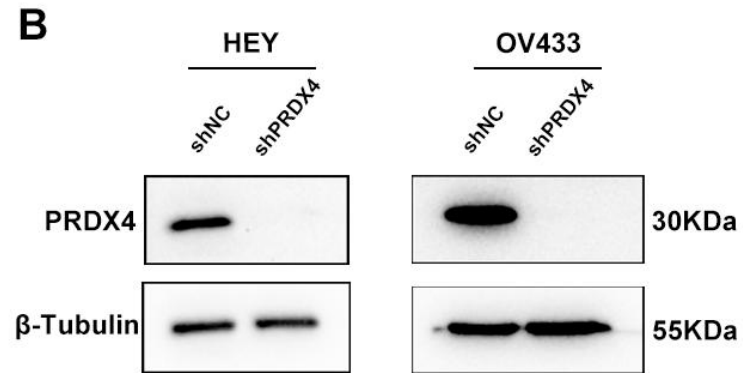

Uncropped original western blots

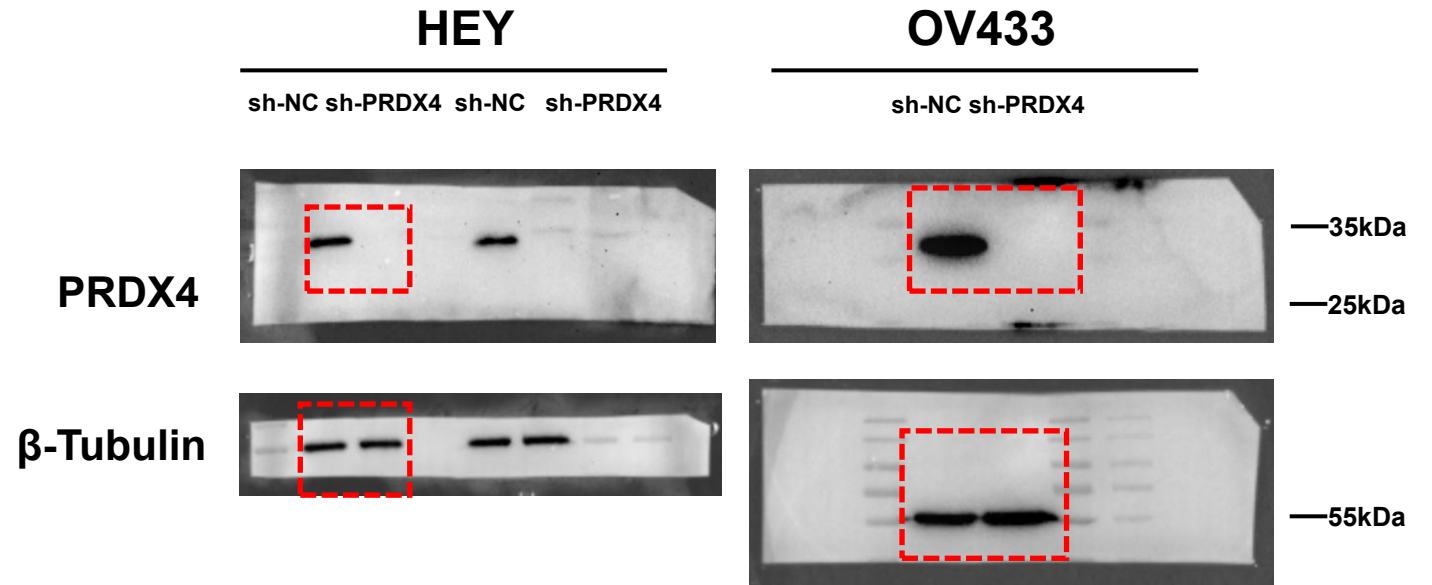

Figure S1 B

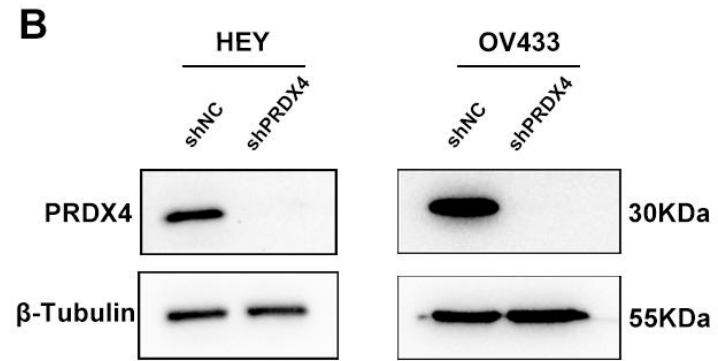

Uncropped original western blots

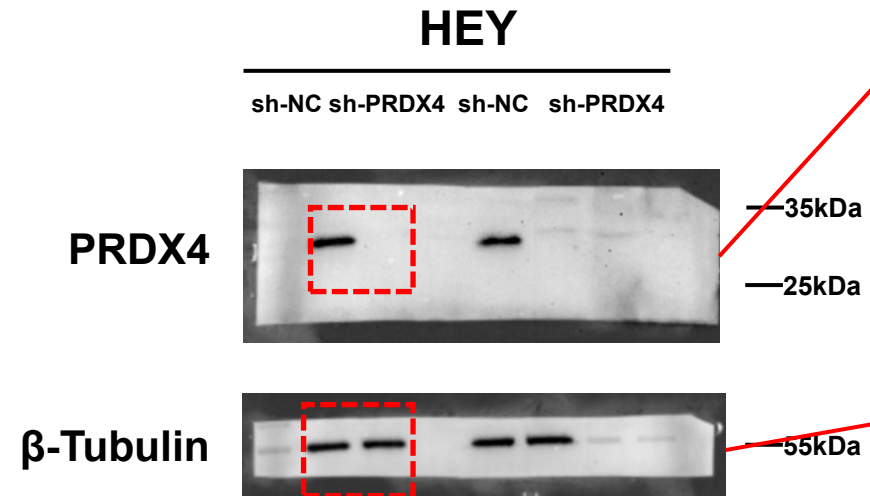

Original chemiluminescence image

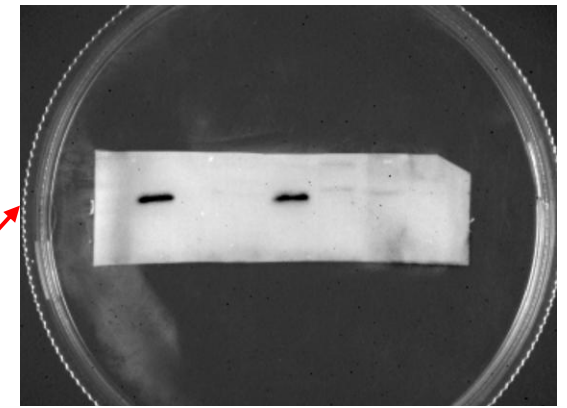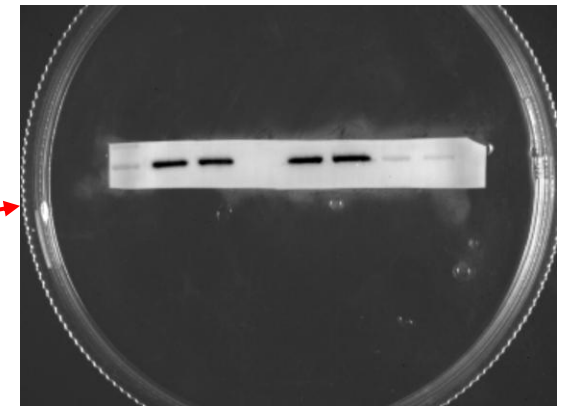

Figure S1 B

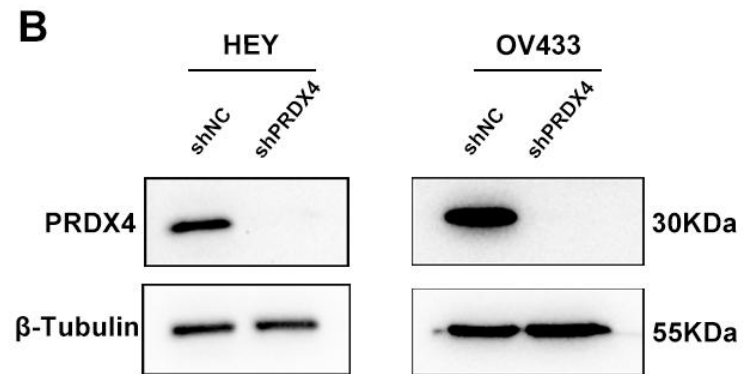

Uncropped original western blots

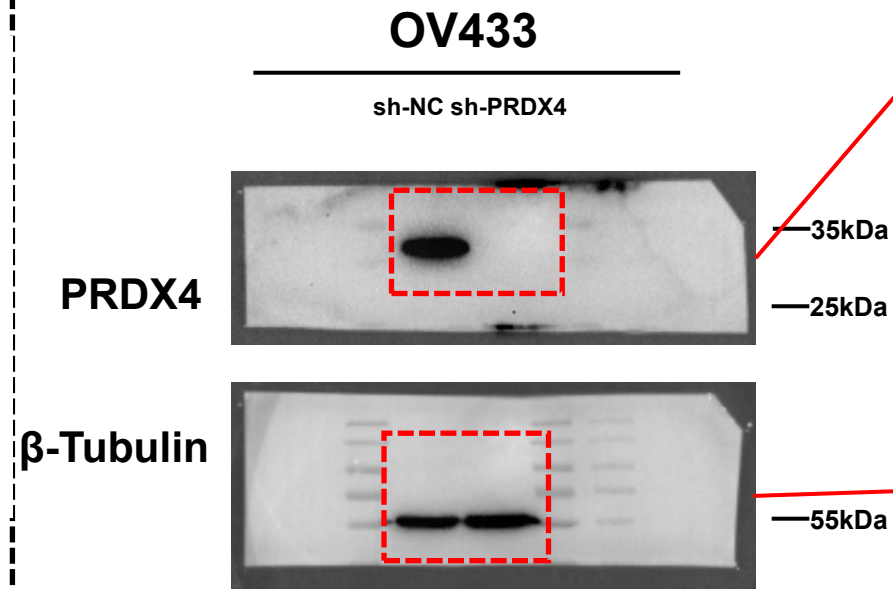

Original chemiluminescence image

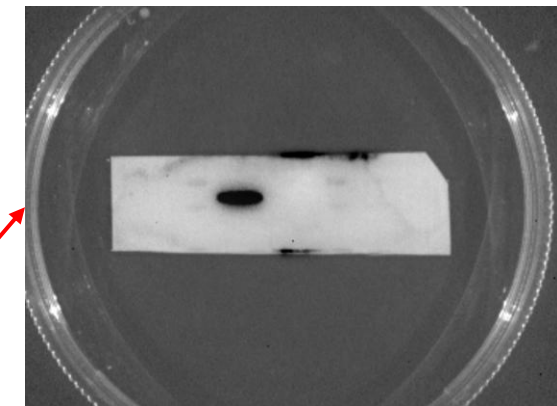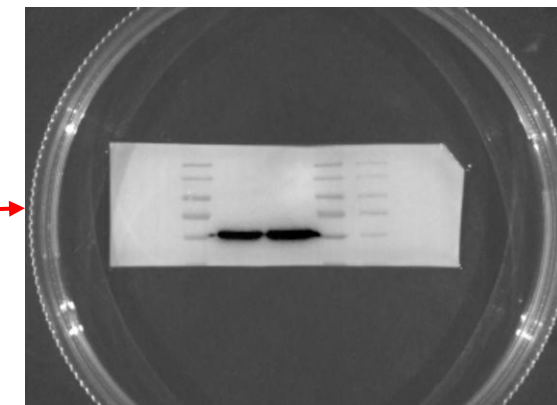

**Fig.S1 C Original data -WB**

Figure S1 C

C

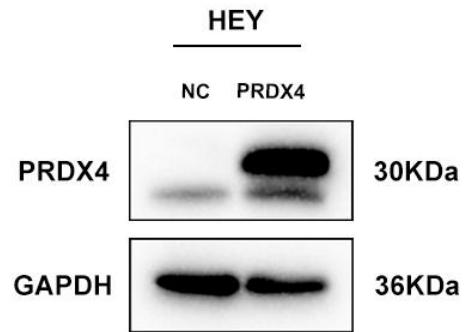

Uncropped original western blots

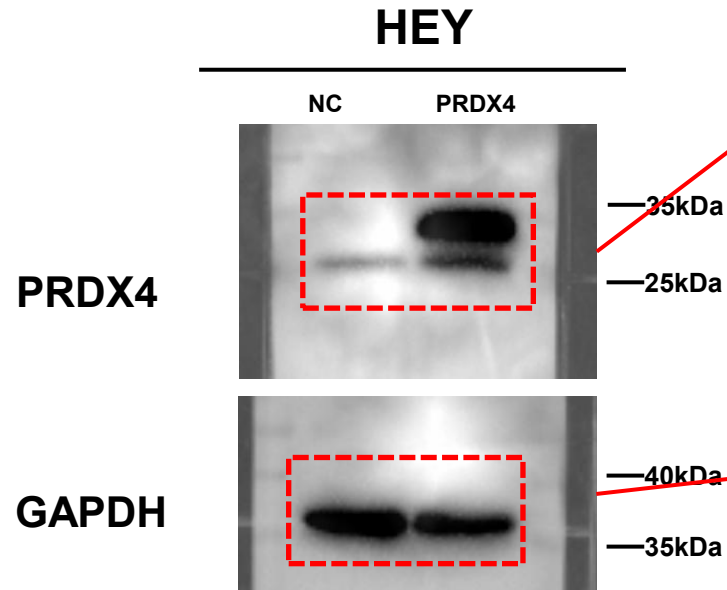

Original chemiluminescence image

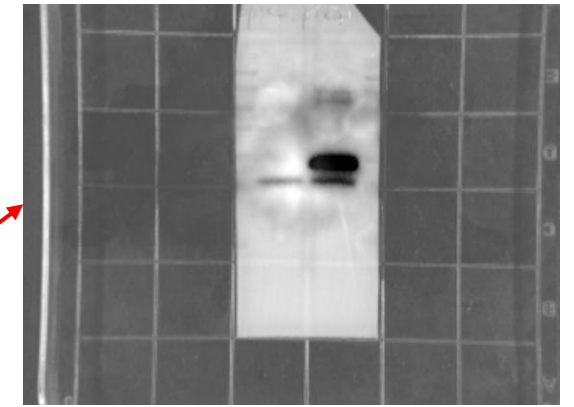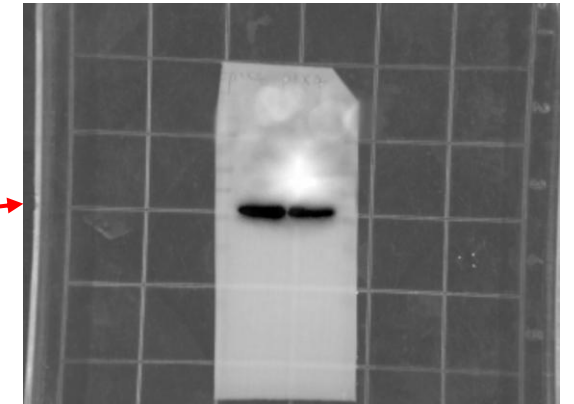

Supplement: Supplementary file 2 [file f3f5be2aed4a8d350ea51bd0.pdf]
