# Supplementary material
Source: Research Square preprint supplement (doi:10.21203/rs.3.rs-8481900/v1)
Supplement: Supplementary file 1 [file cd22434886b70157e219f5ad.docx]

**Supplementary Figure 1**

**
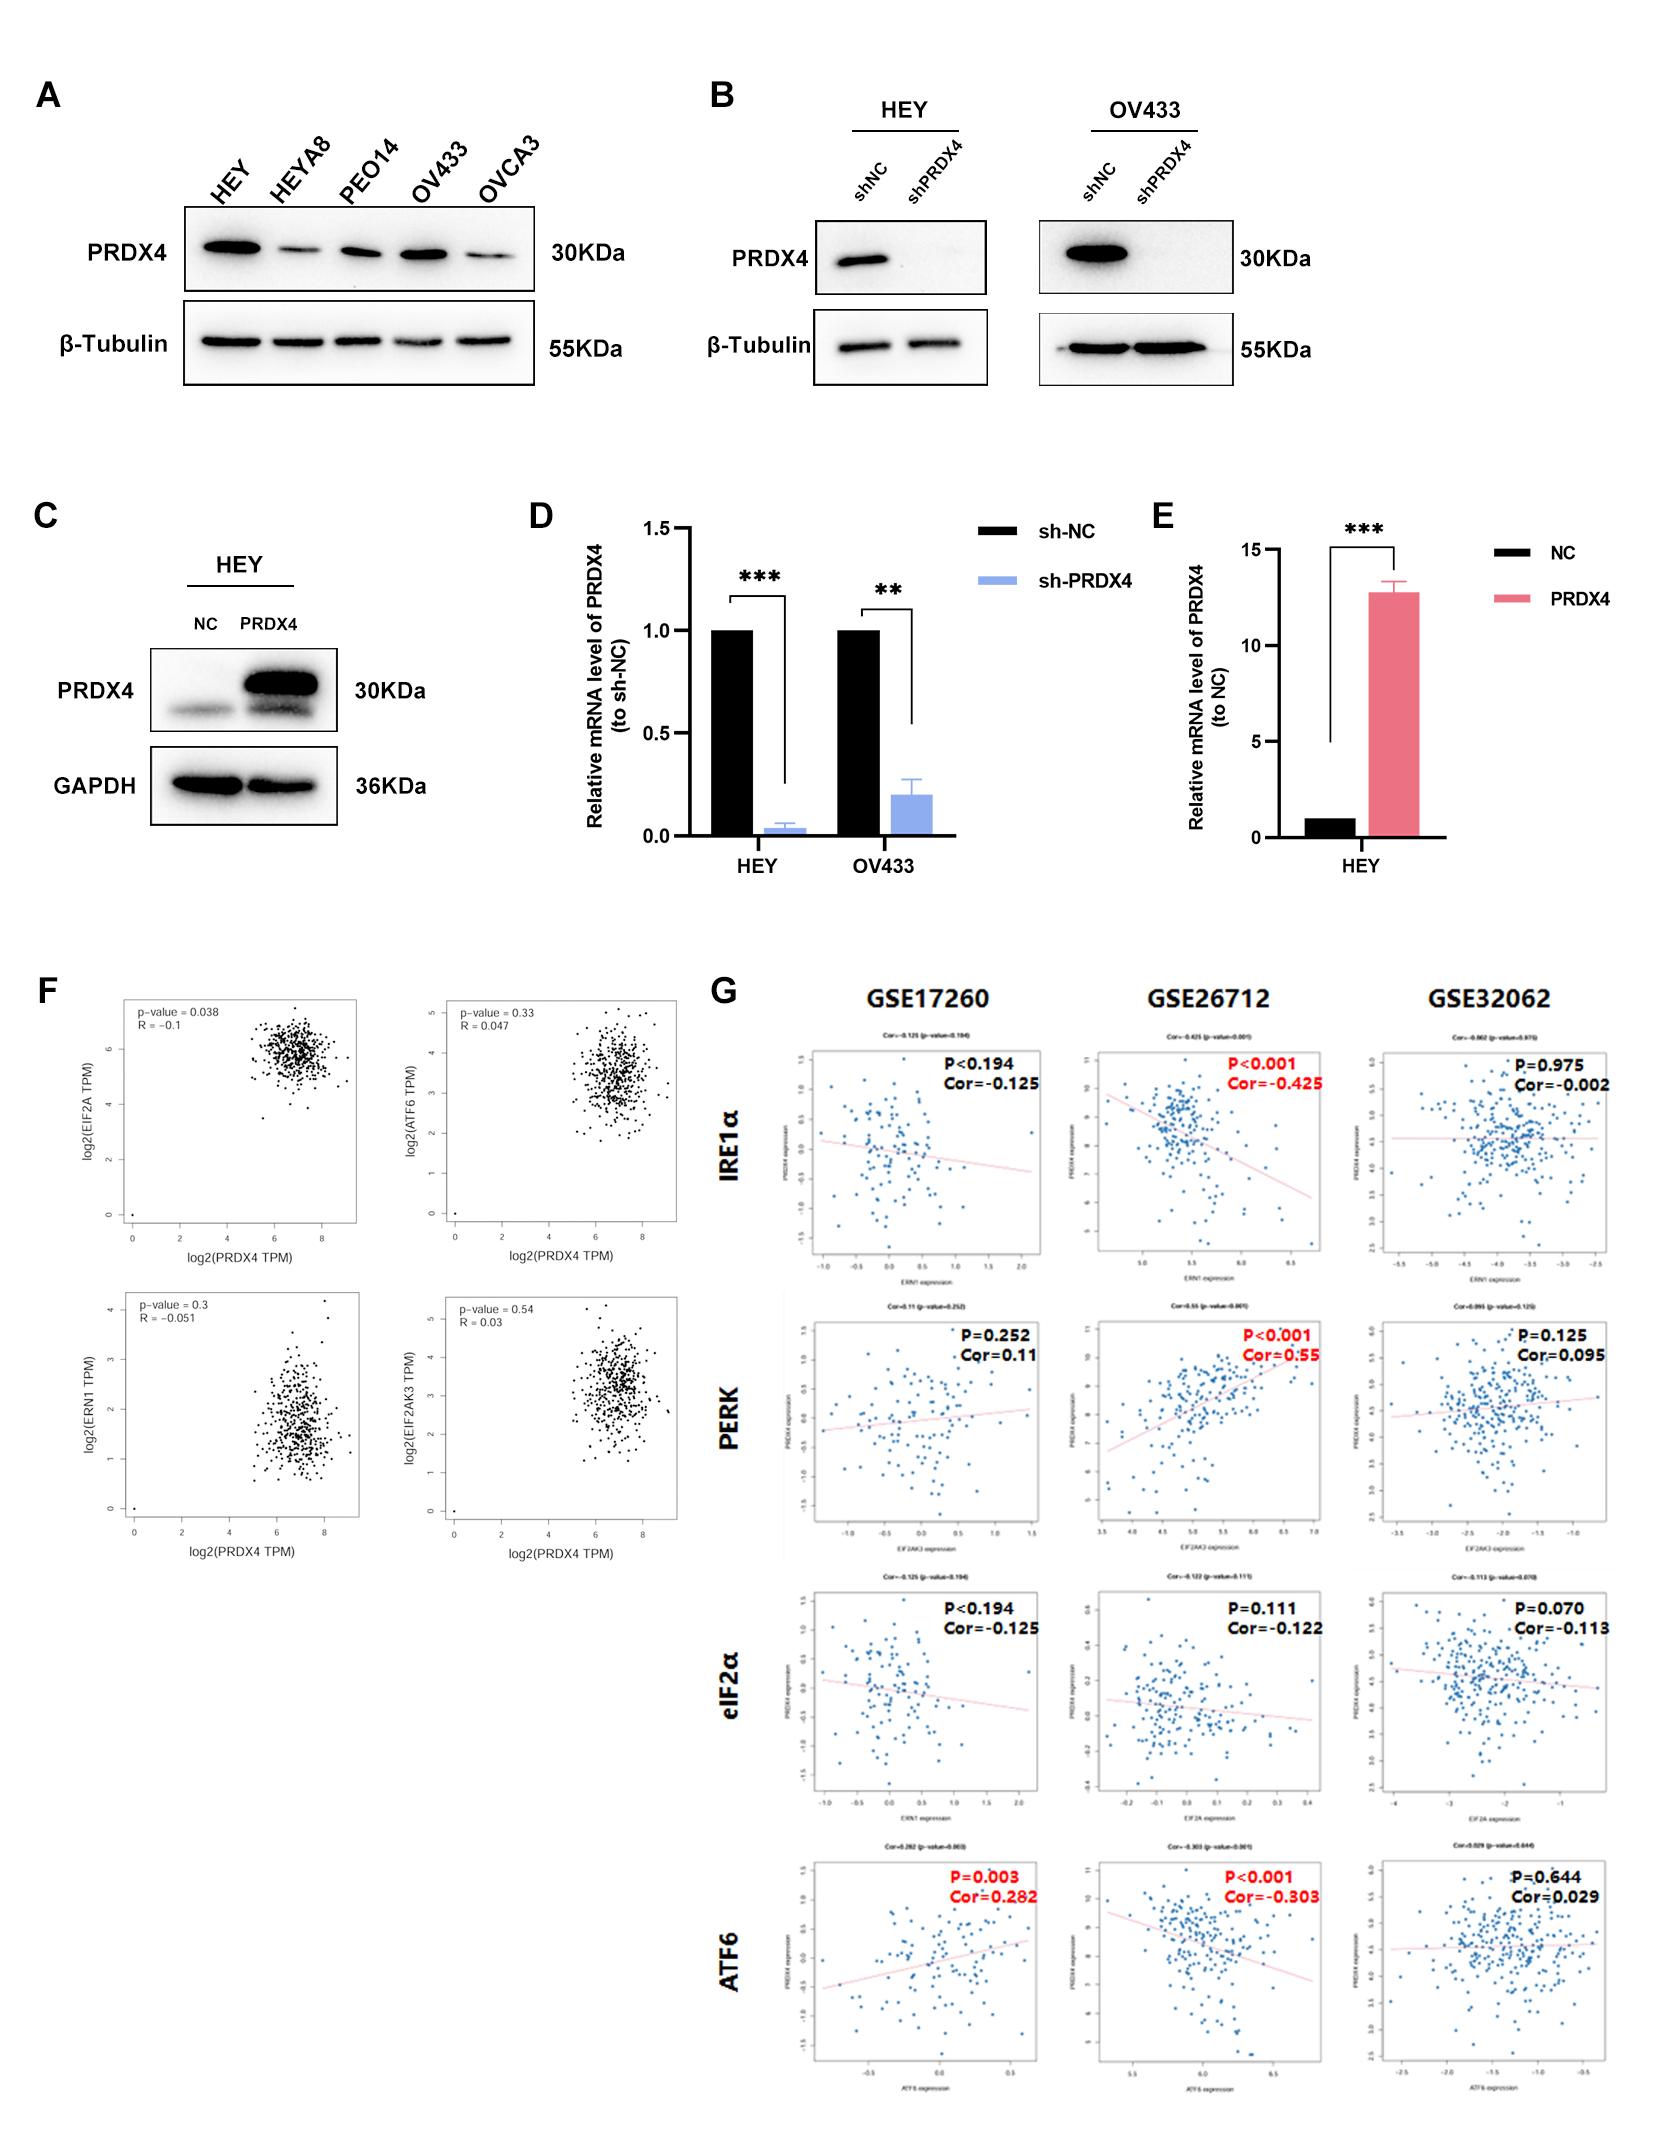
**

**Fig. S1** **A**. The protein expression levels of PRDX4 in different serous ovarian cancer cell lines. **B.** The Western blot analysis of PRDX4 expression in HEY and OV433 cells following PRDX4 knockdown. **C**. The Western blot analysis of PRDX4 expression in HEY cells with PRDX4 overexpression. **D**. The relative PRDX4 mRNA expression in HEY and OV433 cells with PRDX4 knockdown, as assessed by qRT‑PCR. **E.** Therelative PRDX4 mRNA expression in HEY cells with PRDX4 overexpression, as assessed by qRT‑PCR. **F.** Correlation analysis of PRDX4 expression with PERK, EIF2α, IRE1α, and ATF6, utilizing TCGA ovarian cancer transcriptome data through the GEPIA platform **G.** Correlation analyses of PRDX4 expression with PERK, EIF2α, IRE1α, and ATF6 across three ovarian cancer transcriptome datasets (GSE17260, GSE26712, and GSE32062).
